# Supplementary material for: Intracranial-Pressure-Monitoring-Assisted Management Associated with Favorable Outcomes in Moderate Traumatic Brain Injury Patients with a GCS of 9–11
Source: MDPI journal article supplement (doi:10.3390/jcm11226661), 2022-11-10
Supplement: s1 [file s1]

**Supplementary Table S6.** Univariate analysis results of GOSE $\leq$ 4 with GCS 11 patients.

| <i>Characteristics</i> | <i>Category</i>     | <i>All patients</i><br>( <i>n</i> =253) | <i>GOSE&gt;4</i><br>( <i>n</i> =174) | <i>GOSE<math>\leq</math>4</i><br>( <i>n</i> =79) | <i>Z/T/<math>\chi^2</math></i> | <i>P-value</i>                       |
|------------------------|---------------------|-----------------------------------------|--------------------------------------|--------------------------------------------------|--------------------------------|--------------------------------------|
| Age (year)             | IQ range            | 53 [42, 62]                             | 53 [43, 64]                          | 55[31, 62]                                       | -1.657                         | 0.098*                               |
| Sex                    | Female              | 79 (31.2%)                              | 56 (70.9%)                           | 23 (29.1%)                                       | 0.238                          | 0.625                                |
|                        | Male                | 174(68.8%)                              | 118 (67.8%)                          | 56 (32.2%)                                       |                                |                                      |
| COPD                   | No                  | 229<br>(90.5%)                          | 156 (68.1%)                          | 73 (31.9%)                                       | 0.478                          | 0.489                                |
|                        | Yes                 | 24(9.5%)                                | 18 (75.0%)                           | 6 (25.0%)                                        |                                |                                      |
| Hypertension           | No                  | 199<br>(78.7%)                          | 137 (68.8%)                          | 62 (31.2%)                                       | 0.002                          | 0.963                                |
|                        | Yes                 | 54 (21.3%)                              | 37 (68.5%)                           | 17 (31.5%)                                       |                                |                                      |
| Coronary heart disease | No                  | 242<br>(95.7%)                          | 170 (70.2%)                          | 72 (29.8%)                                       | 4.158                          | 0.041 <sup>b</sup>                   |
|                        | Yes                 | 11 (4.3%)                               | 4 (36.4%)                            | 7(63.6%)                                         |                                |                                      |
| Diabetes               | No                  | 240<br>(94.9%)                          | 165 (68.8%)                          | 75 (31.3%)                                       | 0.001                          | 0.971 <sup>b</sup>                   |
|                        | Yes                 | 13 (5.1%)                               | 9 (69.2%)                            | 4 (30.8%)                                        |                                |                                      |
| Aspirin                | No                  | 242<br>(95.7%)                          | 168 (69.4%)                          | 74(30.6%)                                        | 1.084                          | 0.298                                |
|                        | Yes                 | 11(4.3%)                                | 6 (54.5%)                            | 5 (45.5%)                                        |                                |                                      |
| Clopidogrel            | No                  | 251<br>(99.2%)                          | 174 (69.3%)                          | 77 (30.7%)                                       | -                              | 0.097 <sup><math>\Delta</math></sup> |
|                        | Yes                 | 2 (0.8%)                                | 0 (0%)                               | 2 (100%)                                         |                                |                                      |
| Anticoagulant          | No                  | 249(98.4%)                              | 171(68.7%)                           | 78 (31.3%)                                       | 0.001                          | 0.971 <sup>b</sup>                   |
|                        | Yes                 | 4 (1.6%)                                | 3 (75.0%)                            | 1 (25.0%)                                        |                                |                                      |
| Alcohol abuse          | No                  | 230<br>(90.9%)                          | 155 (67.4%)                          | 75 (32.6%)                                       | 1.602                          | 0.206 <sup>b</sup>                   |
|                        | Yes                 | 23 (9.1%)                               | 19 (82.6%)                           | 4 (17.4%)                                        |                                |                                      |
| Smoking history        | No                  | 211<br>(83.4%)                          | 144 (68.2%)                          | 67 (31.8%)                                       | 0.165                          | 0.684                                |
|                        | Yes                 | 42 (16.6%)                              | 30 (71.4%)                           | 12 (28.6%)                                       |                                |                                      |
| ISS                    | IQ range            | 11 [11, 14]                             | 11 [11, 14]                          | 11 [11, 14]                                      | -0.825                         | 0.409*                               |
| Injury mechanism       | Motor vehicle       | 142<br>(56.1%)                          | 102 (71.8%)                          | 40 (28.2%)                                       | 1.804                          | 0.614                                |
|                        | Pedestrian accident | 72 (28.5%)                              | 48(66.7%)                            | 24 (33.3%)                                       |                                |                                      |
|                        | Fall                | 33 (13.0%)                              | 20 (60.6%)                           | 13 (39.4%)                                       |                                |                                      |
|                        | Assault             | 6 (2.4%)                                | 4 (66.7%)                            | 2(33.3%)                                         |                                |                                      |
| Marshall's scale       | Type I DI           | 7 (2.8%)                                | 7 (100%)                             | 0 (0%)                                           | 11.267                         | 0.017 <sup><math>\Delta</math></sup> |
|                        | Type II DI          | 183<br>(72.3%)                          | 133 (72.7%)                          | 50 (27.3%)                                       |                                |                                      |
|                        | Type III DI         | 14 (5.5%)                               | 8 (57.1%)                            | 6 (42.9%)                                        |                                |                                      |

|                             |       |                      |             |             |            |        |                    |
|-----------------------------|-------|----------------------|-------------|-------------|------------|--------|--------------------|
|                             |       | Type IV              | 5 (2.0%)    | 2 (40.0%)   | 3 (60.0%)  |        |                    |
|                             |       | DI                   |             |             |            |        |                    |
|                             |       | NEML                 | 44 (17.4%)  | 24 (54.5%)  | 20 (45.5%) |        |                    |
| Midline (mm)                | shift | IQ range             | 0 [0, 2.15] | 0 [0, 2.13] | 0 [0, 2.2] | -0.392 | 0.695*             |
| IVH                         |       | No                   | 228 (90.1%) | 159 (69.7%) | 69 (30.3%) | 0.995  | 0.319              |
|                             |       | Yes                  | 25 (9.9%)   | 15 (60.0%)  | 10 (40.0%) |        |                    |
| tSAH modified Fisher scale  |       | Grade 0              | 71 (28.1%)  | 48 (67.6%)  | 23 (32.4%) | 7.853  | 0.046              |
|                             |       | Grade 1              | 99 (39.1%)  | 66 (66.7%)  | 33 (33.3%) |        |                    |
|                             |       | Grade 2              | 64 (25.3%)  | 51 (79.7%)  | 13 (20.3%) |        |                    |
|                             |       | Grade 3              | 19 (7.5%)   | 9 (47.4%)   | 10 (52.6%) |        |                    |
| Skull fracture              |       | No                   | 94 (37.2%)  | 64(68.1%)   | 30 (31.9%) | 0.039  | 0.889              |
|                             |       | Yes                  | 159 (62.8%) | 110 (69.2%) | 49 (30.8%) |        |                    |
| EDH                         |       | No                   | 194 (76.7%) | 135 (69.6%) | 59 (30.4%) | 0.256  | 0.613              |
|                             |       | Yes                  | 59 (23.3%)  | 39 (66.1%)  | 20 (33.9%) |        |                    |
| SDH                         |       | No                   | 147 (58.1%) | 112(76.2%)  | 35 (23.8%) | 8.985  | 0.003              |
|                             |       | Yes                  | 106 (41.9%) | 62 (58.5%)  | 44 (41.5%) |        |                    |
| Location of contusion (LOC) |       | None                 | 51 (20.2%)  | 46 (90.2%)  | 5 (9.8%)   | 17.601 | 0.001              |
|                             |       | Frontal              | 53 (20.9%)  | 39 (73.6%)  | 14 (26.4%) |        |                    |
|                             |       | Temporal             | 27 (10.7%)  | 19 (70.4%)  | 8 (29.6%)  |        |                    |
|                             |       | Frontal and temporal | 112 (44.3%) | 64 (57.1%)  | 48 (42.9%) |        |                    |
|                             |       | Others' location     | 10 (4.0%)   | 6 (60.0%)   | 4 (40.0%)  |        |                    |
| DAI                         |       | No                   | 236 (93.3%) | 161 (68.2%) | 75 (31.8%) | 0.508  | 0.474 <sup>b</sup> |
|                             |       | Yes                  | 17 (6.7%)   | 13 (76.5%)  | 4 (23.5%)  |        |                    |
| ICP monitored               |       | No                   | 166 (65.6%) | 114 (68.7%) | 52 (31.3%) | 0.306  | 0.816              |
|                             |       | Yes                  | 87 (34.4%)  | 60 (69.0%)  | 27 (31.0%) |        |                    |

DAI, Diffuse axonal injury, COPD, chronic obstructive pulmonary disease, ND, Neurological deterioration

\*P-value obtained by a nonparametric test

<sup>b</sup>P-value obtained by continuity correction Chi-square test

<sup>Δ</sup>P-value obtained by Fisher's exact test

Others' locations: Parietal/occipital/cerebellum
