# Supplementary material for: Intracranial-Pressure-Monitoring-Assisted Management Associated with Favorable Outcomes in Moderate Traumatic Brain Injury Patients with a GCS of 9–11
Source: MDPI journal article supplement (doi:10.3390/jcm11226661), 2022-11-10
Supplement: s1 [file s1]

**Supplementary Table S15.** The impact of 72h ICP management intensity on ND.

| <i>Characteristic</i> | <i>Non-ND</i><br><i>(n=219)</i> | <i>ND</i><br><i>(n=131)</i> | <i>Z</i> | <i>P-value</i> |
|-----------------------|---------------------------------|-----------------------------|----------|----------------|
| 72h-TILscore (total)  | 12 (9, 16)                      | 10.5 (9, 13)                | -2.571   | 0.010          |
