# Supplementary material for: Intracranial-Pressure-Monitoring-Assisted Management Associated with Favorable Outcomes in Moderate Traumatic Brain Injury Patients with a GCS of 9–11
Source: MDPI journal article supplement (doi:10.3390/jcm11226661), 2022-11-10
Supplement: s1 [file s1]

**Supplementary Table S1. Patients' characteristics of non-ICP and ICP monitored**

| <i>Characteristics</i>     | <i>Category</i>  | <i>All patients<br/>(n=350)</i> | <i>Non-ICP<br/>monitored<br/>(n=205)</i> | <i>ICP monitored<br/>(n=145)</i> | <i>Z/T/<math>\chi^2</math></i> | <i>P-value</i> |
|----------------------------|------------------|---------------------------------|------------------------------------------|----------------------------------|--------------------------------|----------------|
| <b><i>At admission</i></b> |                  |                                 |                                          |                                  |                                |                |
| Age                        | IQ range         | 54 [42, 63]                     | 54 [43, 63]                              | 54[43, 63]                       | -0.273                         | 0.786*         |
| Sex                        | Female           | 95 (27.1%)                      | 65 (68.4%)                               | 30 (31.6%)                       | 5.341                          | 0.021          |
|                            | Male             | 255(72.9%)                      | 140 (54.7%)                              | 115 (45.3%)                      |                                |                |
| COPD                       | No               | 314<br>(90.0%)                  | 185 (58.9%)                              | 129 (41.1%)                      | 0.278                          | 0.598          |
|                            | Yes              | 36(10.0%)                       | 20 (54.8%)                               | 16 (45.2%)                       |                                |                |
| Hypertension               | No               | 270<br>(77.4%)                  | 165 (61.1%)                              | 105 (38.9%)                      | 3.471                          | 0.062          |
|                            | Yes              | 80 (22.6%)                      | 40 (50.0%)                               | 40 (50.0%)                       |                                |                |
| Coronary heart<br>disease  | No               | 334<br>(95.2%)                  | 195 (58.4%)                              | 139 (41.6%)                      | 0.015                          | 0.901          |
|                            | Yes              | 16 (4.8%)                       | 10 (60.5%)                               | 6(39.5%)                         |                                |                |
| Diabetes                   | No               | 327<br>(93.5%)                  | 190 (58.1%)                              | 137 (41.9%)                      | 0.260                          | 0.610          |
|                            | Yes              | 23 (6.5%)                       | 15 (65.6%)                               | 8 (34.4%)                        |                                |                |
| Aspirin                    | No               | 331<br>(94.8%)                  | 195 (58.9%)                              | 136(41.1%)                       | 0.558                          | 0.455          |
|                            | Yes              | 19(5.2%)                        | 10 (52.6%)                               | 9 (47.4%)                        |                                |                |
| Clopidogrel                | No               | 347<br>(99.4%)                  | 203 (58.5%)                              | 144 (41.5%)                      | 0.000                          | 1.000          |
|                            | Yes              | 3 (0.6%)                        | 2 (66.7%)                                | 1 (33.3%)                        |                                |                |
| Anticoagulant              | No               | 344(98.5%)                      | 202(72.7%)                               | 142 (41.3%)                      | 0.149                          | 0.699          |
|                            | Yes              | 6 (1.5%)                        | 3 (50.0%)                                | 3 (50.0%)                        |                                |                |
| Alcohol abuse              | No               | 319<br>(91.2%)                  | 192 (60.2%)                              | 127 (39.8%)                      | 4.602                          | 0.032          |
|                            | Yes              | 31 (8.8%)                       | 13 (42.2%)                               | 18 (57.8%)                       |                                |                |
| Smoking history            | No               | 296<br>(84.8%)                  | 176 (59.5%)                              | 120 (40.5%)                      | 0.813                          | 0.367          |
|                            | Yes              | 54 (15.2%)                      | 29 (53.8%)                               | 25 (46.2%)                       |                                |                |
| GCS score                  | IQ range         | 10 [9, 11]                      | 10 [10, 11]                              | 10 [9, 10]                       | -3.593                         | 0.001*         |
|                            | >10              | 253<br>(72.3%)                  | 166 (65.6%)                              | 87 (34.4%)                       | 18.651                         | <0.001         |
|                            | ≤10              | 97 (27.7%)                      | 39 (40.2%)                               | 58 (59.8%)                       |                                |                |
| ISS                        | IQ range         | 11 [11, 17]                     | 11 [11, 14]                              | 14 [11, 19]                      | -3.718                         | 0.001*         |
|                            | ≥15              | 89 (25.4%)                      | 38 (42.7%)                               | 51 (57.3%)                       | 12.395                         | <0.001         |
|                            | <15              | 261<br>(74.6%)                  | 167 (64.0%)                              | 94 (36.0%)                       |                                |                |
| Injury<br>mechanism        | Motor<br>vehicle | 186<br>(53.3%)                  | 102 (54.8%)                              | 84 (45.2%)                       | 4.799                          | 0.181          |

|                             |                      |             |             |             |        |        |
|-----------------------------|----------------------|-------------|-------------|-------------|--------|--------|
| Marshall's scale            | Pedestrian accident  | 106 (30.3%) | 71(67.0%)   | 35 (33.0%)  | 11.653 | 0.018△ |
|                             | Fall                 | 47 (13.4%)  | 25 (53.2%)  | 22 (46.8%)  |        |        |
|                             | Assault              | 11 (3.1%)   | 7 (63.6%)   | 4(36.4%)    |        |        |
|                             | Type I DI            | 13 (3.7%)   | 7 (53.8%)   | 6 (46.2%)   |        |        |
|                             | Type II DI           | 245 (70.2%) | 151 (61.6%) | 94 (38.4%)  |        |        |
|                             | Type III DI          | 19 (5.4%)   | 7 (36.8%)   | 12 (63.2%)  |        |        |
|                             | Type IV DI           | 10 (2.9%)   | 2 (20.0%)   | 8 (80.0%)   |        |        |
|                             | NEML                 | 63 (17.8%)  | 38 (59.7%)  | 25 (40.3%)  |        |        |
| Midline shift (mm)          | IQ range             | 0 [0, 1.9]  | 0 [0, 0]    | 0 [0, 3.45] | -4.471 | 0.001* |
|                             | ≥2.5                 | 86 (24.6%)  | 26 (30.2%)  | 60 (69.8%)  | 37.735 | <0.001 |
|                             | <2.5                 | 264 (75.4%) | 179 (67.8%) | 85 (32.2%)  |        |        |
| IVH                         | No                   | 311 (89.1%) | 182 (58.5%) | 129 (41.5%) | 0.005  | 0.941  |
| tSAH modified Fisher scale  | Yes                  | 39 (10.9%)  | 23 (59.9%)  | 16 (40.1%)  | 12.915 | 0.005  |
|                             | Grade 0              | 92 (26.4%)  | 57 (62.0%)  | 35 (38.0%)  |        |        |
|                             | Grade 1              | 140 (40.1%) | 93 (66.4%)  | 47 (33.6%)  |        |        |
|                             | Grade 2              | 87 (24.9%)  | 43 (49.4%)  | 44 (50.6%)  |        |        |
| Skull fracture              | Grade 3              | 31 (8.6%)   | 12 (36.7%)  | 19 (63.3%)  | 4.097  | 0.043  |
|                             | No                   | 125 (35.8%) | 82(65.6%)   | 43 (34.4%)  |        |        |
|                             | Yes                  | 225 (64.2%) | 123 (54.5%) | 102 (45.5%) |        |        |
| EDH                         | No                   | 269 (77.1%) | 160 (59.5%) | 109 (40.5%) | 0.509  | 0.475  |
| SDH                         | Yes                  | 81(22.9%)   | 45 (56.5%)  | 36 (43.5%)  | 14.851 | <0.001 |
|                             | No                   | 187 (53.6%) | 127(67.9%)  | 60 (32.1%)  |        |        |
|                             | Yes                  | 163 (46.4%) | 78 (46.5%)  | 85 (53.5%)  |        |        |
| Location of contusion (LOC) | None                 | 79 (22.6%)  | 59 (74.7%)  | 20 (25.3%)  | 12.106 | 0.019  |
|                             | Frontal              | 73 (20.9%)  | 44 (60.3%)  | 29 (39.7%)  |        |        |
|                             | Temporal             | 54 (15.5%)  | 30 (55.6%)  | 24 (44.4%)  |        |        |
|                             | Frontal and temporal | 127 (36.4%) | 70 (55.1%)  | 57 (44.9%)  |        |        |
|                             |                      |             |             |             |        |        |

|                         |                  |             |               |             |        |                    |
|-------------------------|------------------|-------------|---------------|-------------|--------|--------------------|
|                         | Others' location | 17 (4.6%)   | 9 (52.9.0%)   | 8 (47.1.0%) |        |                    |
| DAI                     | No               | 326 (93.4%) | 191 (58.6.5%) | 135 (41.4%) | 0.038  | 0.846              |
|                         | Yes              | 24 (6.6%)   | 14 (59.5%)    | 10 (40.5%)  |        |                    |
| <b><i>In ICU</i></b>    |                  |             |               |             |        |                    |
| ICP monitoring time (h) | -                | 71.0±3.4    | -             | 71.0±3.4    | -      | -                  |
| Intracranial infection  | No               | 341 (97.4%) | 201 (58.9%)   | 140 (41.1%) | 0.280  | 0.597 <sup>b</sup> |
|                         | Yes              | 9 (2.6%)    | 4 (44.4%)     | 5 (55.6%)   |        |                    |
| ICP related hemorrhage  | No               | 346 (98.9%) | 205 (59.2%)   | 141 (40.8%) | -      | 0.008 <sup>Δ</sup> |
|                         | Yes              | 4 (1.1%)    | 0 (0%)        | 4 (100%)    |        |                    |
| ICU-LOS                 | IQ range         | 5 [3, 10]   | 6 [3, 10]     | 4 [2, 9]    | -3.491 | 0.002*             |
| LOS in hospital         | IQ range         | 11 [4, 13]  | 10 [6, 12]    | 8 [5, 13]   | -4.071 | 0.001*             |

DAI, Diffuse axonal injury, COPD, chronic obstructive pulmonary disease, ND, Neurological deterioration, LOS, length of stay

\*P-value obtained by a nonparametric test

<sup>Δ</sup>P-value obtained by Fisher's exact test

Others' locations: Parietal/occipital/cerebellum
