# Supplementary material for: Intracranial-Pressure-Monitoring-Assisted Management Associated with Favorable Outcomes in Moderate Traumatic Brain Injury Patients with a GCS of 9–11
Source: MDPI journal article supplement (doi:10.3390/jcm11226661), 2022-11-10
Supplement: s1 [file s1]

**Supplementary Table S2.** The AUC of continuous variables was investigated by using univariate analysis with ICP and non-ICP groups.

|                       | AUC   | 95%CI       | P       | Cutoff     | Sen (%) | Spe (%) |
|-----------------------|-------|-------------|---------|------------|---------|---------|
| ISS score             | 0.591 | 0.529~0.653 | 0.004   | $\geq 15$  | 35.80   | 81.50   |
| GCS score             | 0.647 | 0.572~0.701 | 0.001   | $\leq 10$  | 77.20   | 43.70   |
| Midline shift<br>(mm) | 0.654 | 0.594~0.714 | < 0.001 | $\geq 2.5$ | 46.9    | 83.4    |
