# Supplementary material for: Intracranial-Pressure-Monitoring-Assisted Management Associated with Favorable Outcomes in Moderate Traumatic Brain Injury Patients with a GCS of 9–11
Source: MDPI journal article supplement (doi:10.3390/jcm11226661), 2022-11-10
Supplement: s1 [file s1]

**Supplementary Table S16.** The AUC of different ICP characteristics on GOSE $\leq$ 4.

|                          | AUC   | 95%CI       | P      | Cutoff | Sensitivity | Specificity |
|--------------------------|-------|-------------|--------|--------|-------------|-------------|
| Mean ICP<br>(mmHg)       | 0.698 | 0.606~0.789 | <0.001 | >15.8  | 51.01       | 86.21       |
| Number of<br>ICP>15mmHg  | 0.681 | 0.587~0.774 | <0.001 | >25.5  | 58.80       | 75.54       |
| Number of<br>ICP>20 mmHg | 0.660 | 0.561~0.759 | 0.002  | >5.5   | 43.31       | 95.37       |
