# Supplementary material for: Intracranial-Pressure-Monitoring-Assisted Management Associated with Favorable Outcomes in Moderate Traumatic Brain Injury Patients with a GCS of 9–11
Source: MDPI journal article supplement (doi:10.3390/jcm11226661), 2022-11-10
Supplement: s1 [file s1]

**Supplementary Table S3.** The results of the multivariate logistic regression analysis of ICP monitored.

| Characteristics             |                      | OR    | 95%CI       | P-value |
|-----------------------------|----------------------|-------|-------------|---------|
| GCS score                   | ≤10                  | 1.751 | 1.216-3.020 | 0.003   |
|                             | >10*                 | 1     |             |         |
| ISS                         | ≥15                  | 1.535 | 0.853-2.762 | 0.153   |
|                             | <15*                 | 1     |             |         |
| Midline shift (mm)          | ≥2.5                 | 3.916 | 2.076-7.386 | <0.001  |
|                             | <2.5*                | 1     |             |         |
| Sex                         | Male                 | 1.177 | 0.666-2.08  | 0.575   |
|                             | Female*              | 1     |             |         |
| Alcohol abuse               | Yes                  | 1.822 | 0.772-4.304 | 0.171   |
|                             | No*                  | 1     |             |         |
| Marshall's scale            | Type II DI           | 2.123 | 0.517-8.713 | 0.296   |
|                             | Type III DI          | 0.96  | 0.502-1.833 | 0.901   |
|                             | Type IV DI           | 1.007 | 0.268-3.786 | 0.991   |
|                             | NEML                 | 1.221 | 0.203-7.356 | 0.828   |
|                             | Type I DI*           | 1     |             |         |
| SDH                         | Yes                  | 1.772 | 1.065-2.949 | 0.028   |
|                             | No*                  | 1     |             |         |
| tSAH modified Fisher scale  | Grade 1              | 0.884 | 0.484-1.27  | 0.14    |
|                             | Grade 2              | 1.328 | 0.731-2.823 | 0.18    |
|                             | Grade 3              | 1.441 | 0.866-3.171 | 0.1     |
|                             | Grade 0*             | 1     |             |         |
| Skull fracture              | Yes                  | 1.476 | 0.843-2.552 | 0.175   |
|                             | No*                  | 1     |             |         |
| Location of contusion (LOC) | Frontal              | 0.642 | 0.181-2.274 | 0.492   |
|                             | Temporal             | 0.671 | 0.196-2.293 | 0.524   |
|                             | Frontal and temporal | 0.739 | 0.206-2.648 | 0.642   |
|                             | Others' location     | 0.915 | 0.28-2.993  | 0.883   |
|                             | None*                |       |             |         |

OR odds ratio; 95% CI 95%, confidence interval; \* control group
