# Supplementary material for: Intracranial-Pressure-Monitoring-Assisted Management Associated with Favorable Outcomes in Moderate Traumatic Brain Injury Patients with a GCS of 9–11
Source: MDPI journal article supplement (doi:10.3390/jcm11226661), 2022-11-10
Supplement: s1 [file s1]

**Supplementary Table S7.** Univariate analysis results of GOSE $\leq 4$  with GCS 9-10 patients.

| <i>Characteristics</i> | <i>Category</i>     | <i>All patients</i><br><i>(n=97)</i> | <i>GOSE<math>\geq 4</math></i><br><i>(n=55)</i> | <i>GOSE<math>\leq 4</math></i><br><i>(n=42)</i> | <i>Z/T/<math>\chi^2</math></i> | <i>P-value</i>     |
|------------------------|---------------------|--------------------------------------|-------------------------------------------------|-------------------------------------------------|--------------------------------|--------------------|
| Age (year)             | IQ range            | 55 [42, 64]                          | 52 [41, 60]                                     | 56[44, 64]                                      | -0.361                         | 0.718*             |
| Sex                    | Female              | 16 (16.5%)                           | 9 (56.3%)                                       | 7 (43.8%)                                       | 0.002                          | 0.968              |
|                        | Male                | 81(83.5%)                            | 46 (56.8%)                                      | 35 (43.2%)                                      |                                |                    |
| COPD                   | No                  | 86 (88.7%)                           | 48 (55.8%)                                      | 38 (44.2%)                                      | 0.029                          | 0.865 <sup>b</sup> |
|                        | Yes                 | 11(11.3%)                            | 7 (63.6%)                                       | 4 (36.4%)                                       |                                |                    |
| Hypertension           | No                  | 72 (74.2%)                           | 39 (54.2%)                                      | 33 (45.8%)                                      | 0.731                          | 0.393              |
|                        | Yes                 | 25 (25.8%)                           | 16 (64.0%)                                      | 9 (36.0%)                                       |                                |                    |
| Coronary heart disease | No                  | 93 (95.9%)                           | 52 (55.9%)                                      | 41 (44.1%)                                      | 0.057                          | 0.811 <sup>b</sup> |
|                        | Yes                 | 4 (4.1%)                             | 3 (75.0%)                                       | 1(25.0%)                                        |                                |                    |
| Diabetes               | No                  | 87 (89.7%)                           | 48 (55.2%)                                      | 39 (44.8%)                                      | 0.313                          | 0.576 <sup>b</sup> |
|                        | Yes                 | 10 (10.3%)                           | 7 (70.0%)                                       | 3 (30.0%)                                       |                                |                    |
| Aspirin                | No                  | 90 (92.8%)                           | 52 (57.8%)                                      | 38(42.2%)                                       | 0.138                          | 0.710 <sup>b</sup> |
|                        | Yes                 | 7(7.2%)                              | 3 (42.9%)                                       | 4 (57.1%)                                       |                                |                    |
| Clopidogrel            | No                  | 97 (100%)                            | 55 (56.7%)                                      | 42 (43.3%)                                      | -                              | -                  |
|                        | Yes                 | 0 (0%)                               | 0 (0%)                                          | 0 (0%)                                          |                                |                    |
| Anticoagulant          | No                  | 96(99.0%)                            | 55(56.3%)                                       | 41 (43.8%)                                      | -                              | 0.990 <sup>Δ</sup> |
|                        | Yes                 | 1 (1.0%)                             | 0 (0%)                                          | 1 (100.0%)                                      |                                |                    |
| Alcohol abuse          | No                  | 90 (92.8%)                           | 50 (55.6%)                                      | 40 (44.4%)                                      | 0.177                          | 0.674 <sup>b</sup> |
|                        | Yes                 | 7 (7.2%)                             | 5 (71.4%)                                       | 2 (28.6%)                                       |                                |                    |
| Smoking history        | No                  | 86 (88.7%)                           | 49 (57.0%)                                      | 37 (43.0%)                                      | 0.023                          | 0.878              |
|                        | Yes                 | 11 (11.3%)                           | 6 (54.5%)                                       | 5 (45.5%)                                       |                                |                    |
| ISS                    | IQ range            | 14 [11, 17]                          | 14 [11, 17]                                     | 14 [11, 19]                                     | -0.462                         | 0.708*             |
| Injury mechanism       | Motor vehicle       | 45 (46.4%)                           | 24 (53.3%)                                      | 21 (46.7%)                                      | 1.091                          | 0.779              |
|                        | Pedestrian accident | 34 (35.1%)                           | 19(55.9%)                                       | 15 (44.1%)                                      |                                |                    |
|                        | Fall                | 14 (14.4%)                           | 9 (64.3%)                                       | 5 (35.7%)                                       |                                |                    |
|                        | Assault             | 4 (4.1%)                             | 3 (75.0%)                                       | 1(25.0%)                                        |                                |                    |
|                        | Marshall's scale    |                                      |                                                 |                                                 |                                |                    |
|                        | Type I DI           | 6 (6.2%)                             | 5 (83.3%)                                       | 1 (16.7%)                                       | 14.896                         | 0.002 <sup>Δ</sup> |
|                        | Type II DI          | 62 (63.9%)                           | 41 (66.1%)                                      | 21 (33.9%)                                      |                                |                    |
|                        | Type III DI         | 6 (6.2%)                             | 1 (16.7%)                                       | 5 (83.3%)                                       |                                |                    |
|                        | Type IV DI          | 5 (5.2%)                             | 0 (0%)                                          | 5 (100.0%)                                      |                                |                    |
|                        | NEML                | 18 (18.6%)                           | 8 (44.4%)                                       | 10 (55.6%)                                      |                                |                    |
| Midline shift (mm)     | IQ range            | 0 [0, 2.95]                          | 0 [0, 2.40]                                     | 1.9 [0, 3.25]                                   | -2.590                         | 0.010*             |
| IVH                    | No                  | 84 (86.6%)                           | 49 (58.3%)                                      | 35 (41.7%)                                      | 0.680                          | 0.410              |
|                        | Yes                 | 13 (13.4%)                           | 6 (46.2%)                                       | 7 (53.8%)                                       |                                |                    |
| tSAH modified          | Grade 0             | 21 (21.6%)                           | 16 (76.2%)                                      | 5 (23.8%)                                       | 7.946                          | 0.043              |

|                             |                      |            |            |            |        |                    |
|-----------------------------|----------------------|------------|------------|------------|--------|--------------------|
| Fisher scale                |                      |            |            |            |        |                    |
|                             | Grade 1              | 42 (43.3%) | 25 (59.5%) | 17 (40.5%) |        |                    |
|                             | Grade 2              | 23 (23.7%) | 8 (34.8%)  | 15 (65.2%) |        |                    |
|                             | Grade 3              | 11 (11.3%) | 6 (54.5%)  | 5 (45.5%)  |        |                    |
| Skull fracture              | No                   | 31 (32.0%) | 19(61.3%)  | 12 (38.7%) | 0.391  | 0.661              |
|                             | Yes                  | 66 (68.0%) | 36 (54.5%) | 30 (45.5%) |        |                    |
| EDH                         | No                   | 76 (78.4%) | 46 (60.5%) | 30 (39.5%) | 2.092  | 0.148              |
|                             | Yes                  | 21(21.6%)  | 9 (42.9%)  | 12 (57.1%) |        |                    |
| SDH                         | No                   | 41 (42.3%) | 31(75.6%)  | 10 (24.4%) | 10.342 | 0.001              |
|                             | Yes                  | 56 (57.7%) | 24 (42.9%) | 32 (57.1%) |        |                    |
| Location of contusion (LOC) | None                 | 14 (14.4%) | 11 (84.6%) | 2 (15.4%)  | 13.008 | 0.009 <sup>Δ</sup> |
|                             | Frontal              | 16 (16.5%) | 12 (75.0%) | 4 (25.0%)  |        |                    |
|                             | Temporal             | 15 (15.5%) | 10 (66.7%) | 5 (33.3%)  |        |                    |
|                             | Frontal and temporal | 46 (47.4%) | 19 (40.4%) | 28 (59.6%) |        |                    |
|                             | Others' location     | 6 (6.2%)   | 3 (50.0%)  | 3(50.0%)   |        |                    |
| DAI                         | No                   | 91 (93.8%) | 51 (56.0%) | 40 (44.0%) | 0.063  | 0.802 <sup>b</sup> |
|                             | Yes                  | 6 (6.2%)   | 4 (66.7%)  | 2 (33.3%)  |        |                    |
| ICP monitored               | No                   | 39 (40.2%) | 13 (33.3%) | 26 (66.7%) | 11.994 | 0.001              |
|                             | Yes                  | 58 (59.8%) | 42 (72.4%) | 16 (27.6%) |        |                    |

DAI, Diffuse axonal injury, COPD, chronic obstructive pulmonary disease, ND, Neurological deterioration

\*P-value obtained by a nonparametric test

<sup>b</sup>P-value obtained by continuity correction Chi-square test

<sup>Δ</sup>P-value obtained by Fisher's exact test

Others' locations: Parietal/occipital/cerebellum
