# Supplementary material for: Intracranial-Pressure-Monitoring-Assisted Management Associated with Favorable Outcomes in Moderate Traumatic Brain Injury Patients with a GCS of 9–11
Source: MDPI journal article supplement (doi:10.3390/jcm11226661), 2022-11-10
Supplement: s1 [file s1]

**Supplementary Table S10.** The impact of neurological deterioration on GOS≤4.

| <i>Characteristics</i> | <i>Category</i> | <i>All patients</i><br><i>(n=350)</i> | <i>GOS&gt;4</i><br><i>(n=229)</i> | <i>GOS≤4</i><br><i>(n=121)</i> | $\chi^2$ | <i>P-value</i> |
|------------------------|-----------------|---------------------------------------|-----------------------------------|--------------------------------|----------|----------------|
| ND                     | No              | 219 (62.8%)                           | 181 (82.6%)                       | 38 (17.4%)                     | 77.634   | <0.001         |
|                        | Yes             | 131 (37.2%)                           | 48 (36.2%)                        | 83 (63.8%)                     |          |                |
