# Supplementary material for: Intracranial-Pressure-Monitoring-Assisted Management Associated with Favorable Outcomes in Moderate Traumatic Brain Injury Patients with a GCS of 9–11
Source: MDPI journal article supplement (doi:10.3390/jcm11226661), 2022-11-10
Supplement: s1 [file s1]

**Supplementary Table S8.** The results of the multivariate logistic regression analysis of GOSE $\leq$ 4 with GCS9-10 patients.

| Characteristics                |                         | OR     | 95%CI          | P-value |
|--------------------------------|-------------------------|--------|----------------|---------|
| ICP monitored                  | Yes                     | 0.565  | 0.314-0.837    | 0.001   |
|                                | No*                     | 1      |                |         |
| Midline shift (mm)             |                         | 1.229  | 0.992-1.923    | 0.052   |
| Marshall's scale               | Type II DI              | 2.393  | 0.323-28.829   | 0.154   |
|                                | Type III DI             | 22.123 | 1.963-235.421  | 0.010   |
|                                | Type IV DI              | 68.877 | 5.185-1767.872 | 0.003   |
|                                | NEML                    | 9.683  | 2.931-121.438  | 0.034   |
|                                | Type I DI*              | 1      |                |         |
| SDH                            | Yes                     | 3.115  | 1.743-4.599    | 0.004   |
|                                | No*                     | 1      |                |         |
| Location of contusion<br>(LOC) | Frontal                 | 1.589  | 0.847-13.253   | 0.059   |
|                                | Temporal                | 1.934  | 1.133-9.467    | 0.041   |
|                                | Frontal and<br>temporal | 3.214  | 1.921-4.654    | 0.001   |
|                                | Others' location        | 1.389  | 0.702-14.345   | 0.249   |
|                                | None*                   | 1      |                |         |
| tSAH modified Fisher<br>scale  | Grade 1                 | 1.561  | 0.821-8.145    | 0.143   |
|                                | Grade 2                 | 2.389  | 0.899-6.345    | 0.049   |
|                                | Grade 3                 | 1.956  | 0.902-10.041   | 0.109   |
|                                | Grade 0*                |        |                |         |

OR odds ratio; 95% CI 95%, confidence interval; \* control group
