# Supplementary material for: Intracranial-Pressure-Monitoring-Assisted Management Associated with Favorable Outcomes in Moderate Traumatic Brain Injury Patients with a GCS of 9–11
Source: MDPI journal article supplement (doi:10.3390/jcm11226661), 2022-11-10
Supplement: s1 [file s1]

**Supplementary Table S9.** The influence of ICP-monitored therapy on neurological deterioration.

| <i>Characteristics</i> | <i>Category</i> | <i>All patients</i><br><i>(n=350)</i> | <i>Non-ND</i><br><i>(n=219)</i> | <i>ND</i><br><i>(n=131)</i> | $\chi^2$ | <i>P-value</i> |
|------------------------|-----------------|---------------------------------------|---------------------------------|-----------------------------|----------|----------------|
| ICP monitored          | No              | 205 (58.6%)                           | 113 (55.4%)                     | 92 (44.6%)                  | 11.375   | 0.010          |
|                        | Yes             | 145 (41.4%)                           | 106 (73.1%)                     | 39 (26.9%)                  |          |                |
