# Supplementary material for: Intracranial-Pressure-Monitoring-Assisted Management Associated with Favorable Outcomes in Moderate Traumatic Brain Injury Patients with a GCS of 9–11
Source: MDPI journal article supplement (doi:10.3390/jcm11226661), 2022-11-10
Supplement: s1 [file s1]

**Supplementary Table S4.** The 6-Month outcome of all patients.

| <i>Characteristics</i> | <i>Category</i>                       | <i>All patients</i><br><i>(n=350)</i> | <i>Non-ICP</i><br><i>monitored</i><br><i>(n=205)</i> | <i>ICP</i><br><i>monitored</i><br><i>(n=145)</i> | $\chi^2$ | <i>P-value</i> |
|------------------------|---------------------------------------|---------------------------------------|------------------------------------------------------|--------------------------------------------------|----------|----------------|
| 6-Month<br>outcome     | Dead (GOSE-1)                         | 54 (15.4%)                            | 40(19.5%)                                            | 14 (9.7%)                                        | 6.419    | 0.011          |
|                        | Unfavorable<br>survival (GOSE-<br>1~4 | 121 (34.6%)                           | 84 (41.0%)                                           | 37 (25.5%)                                       | 9.176    | 0.002          |
|                        | Favorable<br>survival (GOSE-<br>5~8)  | 229 (65.4%)                           | 121 (59.0%)                                          | 108 (74.5%)                                      |          |                |
