# Supplementary material for: Intracranial-Pressure-Monitoring-Assisted Management Associated with Favorable Outcomes in Moderate Traumatic Brain Injury Patients with a GCS of 9–11
Source: MDPI journal article supplement (doi:10.3390/jcm11226661), 2022-11-10
Supplement: s1 [file s1]

**Supplementary Table S13.** The 72h ICP management intensity between ICP monitored and control group.

| <i>Characteristic</i> | <i>Non-ICP monitored<br/>(n=205)</i> | <i>ICP monitored<br/>(n=145)</i> | <i>Z</i> | <i>P-value</i> |
|-----------------------|--------------------------------------|----------------------------------|----------|----------------|
| 72h-TILscore (total)  | 9 (8, 11)                            | 13 (9, 17)                       | -8.388   | <0.001         |
