# Supplementary material for: Intracranial-Pressure-Monitoring-Assisted Management Associated with Favorable Outcomes in Moderate Traumatic Brain Injury Patients with a GCS of 9–11
Source: MDPI journal article supplement (doi:10.3390/jcm11226661), 2022-11-10
Supplement: s1 [file s1]

**Supplementary Table S12.** The influence of ICP-monitored therapy on neurological deterioration reasons.

| <i>Characteristics</i> | <i>Category</i>       | <i>All patients<br/>(n=131)</i> | <i>Non-ICP<br/>monitored<br/>(n=92)</i> | <i>ICP monitored<br/>(n=39)</i> | $\chi^2$ | <i>P-value</i> |
|------------------------|-----------------------|---------------------------------|-----------------------------------------|---------------------------------|----------|----------------|
| ND causes              | Hematoma expansion    | 42 (32.3%)                      | 22 (52.4%)                              | 20 (47.6%)                      | 9.185    | 0.010          |
|                        | Cerebral edema        | 78 (59.5%)                      | 61 (78.2%)                              | 17 (21.8%)                      |          |                |
|                        | aggravation           |                                 |                                         |                                 |          |                |
|                        | General deterioration | 11 (8.2%)                       | 6 (54.6%)                               | 5 (45.4%)                       |          |                |
