# Supplementary material for: Intracranial-Pressure-Monitoring-Assisted Management Associated with Favorable Outcomes in Moderate Traumatic Brain Injury Patients with a GCS of 9–11
Source: MDPI journal article supplement (doi:10.3390/jcm11226661), 2022-11-10
Supplement: s1 [file s1]

**Supplementary Table S5.** Univariate analysis results of GOSE $\leq 4$ .

| <i>Characteristics</i> | <i>Category</i>     | <i>All patients</i><br>( <i>n</i> =350) | <i>GOSE&gt;4</i><br>( <i>n</i> =229) | <i>GOSE<math>\leq 4</math></i><br>( <i>n</i> =121) | <i>Z/T/<math>\chi^2</math></i> | <i>P-value</i>      |
|------------------------|---------------------|-----------------------------------------|--------------------------------------|----------------------------------------------------|--------------------------------|---------------------|
| Age (year)             | IQ range            | 54 [42, 63]                             | 52 [42, 62]                          | 56[44, 64]                                         | -1.438                         | 0.150*              |
| Sex                    | Female              | 95 (27.1%)                              | 64 (67.4%)                           | 31 (32.6%)                                         | 0.178                          | 0.673               |
|                        | Male                | 255(72.9%)                              | 165 (63.7%)                          | 90 (36.3%)                                         |                                |                     |
| COPD                   | No                  | 314<br>(90.0%)                          | 202 (64.3%)                          | 112 (35.7%)                                        | 2.293                          | 0.130               |
|                        | Yes                 | 36(10.0%)                               | 27 (74.8%)                           | 9 (25.2%)                                          |                                |                     |
| Hypertension           | No                  | 270<br>(77.4%)                          | 177 (65.6%)                          | 93 (34.4%)                                         | 0.002                          | 0.965               |
|                        | Yes                 | 80 (22.6%)                              | 52 (65.8.0%)                         | 28 (34.2%)                                         |                                |                     |
| Coronary heart disease | No                  | 334<br>(95.2%)                          | 221 (66.2%)                          | 113 (33.8%)                                        | 1.048                          | 0.306               |
|                        | Yes                 | 16 (4.8%)                               | 8 (50.0%)                            | 8(50.0%)                                           |                                |                     |
| Diabetes               | No                  | 327<br>(93.5%)                          | 215 (65.7%)                          | 112 (34.3%)                                        | 0.041                          | 0.840               |
|                        | Yes                 | 23 (6.5%)                               | 14 (63.6%)                           | 9 (36.4%)                                          |                                |                     |
| Aspirin                | No                  | 331<br>(94.8%)                          | 219 (66.2%)                          | 112(33.8%)                                         | 0.851                          | 0.356               |
|                        | Yes                 | 19(5.2%)                                | 10 (52.6%)                           | 9 (47.4%)                                          |                                |                     |
| Clopidogrel            | No                  | 347<br>(99.4%)                          | 228 (65.7%)                          | 119 (34.3%)                                        | 1.444                          | 0.229 <sup>b</sup>  |
|                        | Yes                 | 3 (0.6%)                                | 1 (33.3%)                            | 2 (66.7%)                                          |                                |                     |
| Anticoagulant          | No                  | 344(98.5%)                              | 226(65.7%)                           | 118 (34.3%)                                        | 0.071                          | 0.790 <sup>b</sup>  |
|                        | Yes                 | 6 (1.5%)                                | 3 (50.0%)                            | 3 (50.0%)                                          |                                |                     |
| Alcohol abuse          | No                  | 319<br>(91.2%)                          | 207 (64.9%)                          | 112 (35.1%)                                        | 0.866                          | 0.352               |
|                        | Yes                 | 31 (8.8%)                               | 22 (73.3%)                           | 9 (26.7%)                                          |                                |                     |
| Smoking history        | No                  | 296<br>(84.8%)                          | 188 (63.5%)                          | 108 (36.5%)                                        | 3.619                          | 0.061               |
|                        | Yes                 | 54 (15.2%)                              | 41 (75.4%)                           | 13 (24.6%)                                         |                                |                     |
| GCS score              | IQ range            | 10 [9, 11]                              | 10 [10, 11]                          | 10 [9, 10]                                         | -3.914                         | <0.001*             |
| ISS                    | IQ range            | 11 [11, 17]                             | 11 [11, 16]                          | 14 [11, 17]                                        | -0.662                         | 0.508*              |
| Injury mechanism       | Motor vehicle       | 186<br>(53.3%)                          | 124 (66.7%)                          | 62 (33.3%)                                         | 1.850                          | 0.604               |
|                        | Pedestrian accident | 106<br>(30.3%)                          | 69(65.1%)                            | 37 (34.9%)                                         |                                |                     |
|                        | Fall                | 47 (13.4%)                              | 28 (59.6%)                           | 19 (40.4%)                                         |                                |                     |
|                        | Assault             | 11 (3.1%)                               | 8 (68.6%)                            | 3(31.4%)                                           |                                |                     |
|                        |                     |                                         |                                      |                                                    |                                |                     |
| Marshall's scale       | Type I DI           | 13 (3.7%)                               | 12 (92.3%)                           | 1 (3.7%)                                           | 26.427                         | <0.001 <sup>Δ</sup> |
|                        | Type II DI          | 245<br>(70.2%)                          | 174 (71.0%)                          | 71 (29.0%)                                         |                                |                     |
|                        | Type III            | 19 (5.4%)                               | 8 (42.1%)                            | 11 (57.9%)                                         |                                |                     |

|                             |       |                      |             |             |             |        |         |
|-----------------------------|-------|----------------------|-------------|-------------|-------------|--------|---------|
|                             |       | DI                   |             |             |             |        |         |
|                             |       | Type IV              | 10 (2.9%)   | 2 (20.0%)   | 8 (80.0%)   |        |         |
|                             |       | DI                   |             |             |             |        |         |
|                             |       | NEML                 | 63 (17.8%)  | 33 (50.6%)  | 30 (49.4%)  |        |         |
| Midline (mm)                | shift | IQ range             | 0 [0, 1.4]  | 0 [0, 0]    | 0 [0, 2.6]  | -3.542 | <0.001* |
| IVH                         |       | No                   | 311 (89.1%) | 207 (69.5%) | 104 (30.5%) | 1.908  | 0.167   |
| tSAH modified Fisher scale  |       | Yes                  | 39 (10.9%)  | 22 (55.3%)  | 17 (44.7%)  | 4.146  | 0.246   |
|                             |       | Grade 0              | 92 (26.4%)  | 64 (69.6%)  | 28 (30.4%)  |        |         |
|                             |       | Grade 1              | 140 (40.1%) | 90 (64.3%)  | 50 (35.7%)  |        |         |
|                             |       | Grade 2              | 87 (24.9%)  | 59 (67.8%)  | 28 (32.2%)  |        |         |
|                             |       | Grade 3              | 31 (8.6%)   | 17 (56.7%)  | 14 (43.3%)  |        |         |
| Skull fracture              |       | No                   | 125 (35.8%) | 83(66.4%)   | 42 (33.6%)  | 0.099  | 0.754   |
|                             |       | Yes                  | 225 (64.2%) | 146 (64.7%) | 79 (35.3%)  |        |         |
| EDH                         |       | No                   | 269 (77.1%) | 180 (66.9%) | 89 (33.1%)  | 1.302  | 0.254   |
|                             |       | Yes                  | 81(22.9%)   | 49 (60.7%)  | 32 (39.3%)  |        |         |
| SDH                         |       | No                   | 187 (53.6%) | 136(72.7%)  | 51 (27.3%)  | 9.734  | 0.002   |
|                             |       | Yes                  | 163 (46.4%) | 93 (56.8%)  | 70 (43.2%)  |        |         |
| Location of contusion (LOC) |       | None                 | 79 (22.6%)  | 58 (73.4%)  | 21 (26.6%)  | 11.330 | 0.023   |
|                             |       | Frontal              | 73 (20.9%)  | 54 (73.3%)  | 19 (26.7%)  |        |         |
|                             |       | Temporal             | 54 (15.5%)  | 34 (62.6%)  | 20 (37.4%)  |        |         |
|                             |       | Frontal and temporal | 127 (36.4%) | 70 (55.1%)  | 57 (44.9%)  |        |         |
|                             |       | Others` location     | 17 (4.6%)   | 13 (72.5%)  | 4 (27.5%)   |        |         |
| DAI                         |       | No                   | 326 (93.4%) | 212 (65.0%) | 114 (35.0%) | 0.195  | 0.659   |
|                             |       | Yes                  | 24 (6.6%)   | 17 (70.8%)  | 7 (29.2%)   |        |         |
| ICP monitored               |       | No                   | 205 (58.5%) | 121 (58.8%) | 84 (41.2%)  | 9.176  | 0.002   |
|                             |       | Yes                  | 145 (41.5%) | 108 (74.5%) | 37 (25.5%)  |        |         |

DAI, Diffuse axonal injury, COPD, chronic obstructive pulmonary disease, ND, Neurological deterioration

\*P-value obtained by a nonparametric test

<sup>b</sup>P-value obtained by continuity correction Chi-square test

<sup>Δ</sup>P-value obtained by Fisher's exact test

Others' locations: Parietal/occipital/cerebellum
