# Supplementary material for: Intracranial-Pressure-Monitoring-Assisted Management Associated with Favorable Outcomes in Moderate Traumatic Brain Injury Patients with a GCS of 9–11
Source: MDPI journal article supplement (doi:10.3390/jcm11226661), 2022-11-10
Supplement: s1 [file s1]

**Supplementary Table S11.** The influence of ICP-monitored therapy on potential neurological deterioration reasons.

| <i>Characteristics</i> |    | <i>Category</i>               | <i>All patients</i><br><i>(n=350)</i> | <i>Non-ICP</i><br><i>monitored</i><br><i>(n=205)</i> | <i>ICP monitored</i><br><i>(n=145)</i> | $\chi^2$ | <i>P-value</i> |
|------------------------|----|-------------------------------|---------------------------------------|------------------------------------------------------|----------------------------------------|----------|----------------|
| Potential causes       | ND | No potential reasons.         | 210 (59.7%)                           | 110 (52.6%)                                          | 100 (47.4%)                            | 18.787   | < 0.001        |
|                        |    | Hematoma expansion            | 46 (13.4%)                            | 22 (46.8%)                                           | 24 (53.2%)                             |          |                |
|                        |    | Cerebral edema                | 83 (23.7%)                            | 64 (77.1%)                                           | 19 (22.9%)                             |          |                |
|                        |    | aggravation                   |                                       |                                                      |                                        |          |                |
|                        |    | General deterioration reasons | 11 (3.2%)                             | 6 (54.6%)                                            | 5 (45.4%)                              |          |                |
