# Supplementary material for: Intracranial-Pressure-Monitoring-Assisted Management Associated with Favorable Outcomes in Moderate Traumatic Brain Injury Patients with a GCS of 9–11
Source: J Clin Med. 2022 Nov 10;11(22):6661. doi: 10.3390/jcm11226661 (PMC9694446; doi:10.3390/jcm11226661)
Supplement: Supplementary file 1 [file jcm-11-06661-s001.zip]

Archive with 19 entries (19 files):
- STROBE-Checklist.pdf
- Supplementary Figure S1.tiff
- Supplementary Figure S2.tiff
- Supplementary Table S1.pdf
- Supplementary Table S10.pdf
- Supplementary Table S11.pdf
- Supplementary Table S12.pdf
- Supplementary Table S13.pdf
- Supplementary Table S14.pdf
- Supplementary Table S15.pdf
- Supplementary Table S16.pdf
- Supplementary Table S2.pdf
- Supplementary Table S3.pdf
- Supplementary Table S4.pdf
- Supplementary Table S5.pdf
- Supplementary Table S6.pdf
- Supplementary Table S7.pdf
- Supplementary Table S8.pdf
- Supplementary Table S9.pdf
